# Supplementary material for: Petal-like Mn-doped α-Ni(OH)2 nanosheets for high-performance Li–S cathode material
Source: Royal Society of Chemistry journal article supplement (doi:10.1039/d3ra00032j), 2023-01-01
Supplement: d3ra00032j1.pdf [file d3ra00032j1.pdf]

## Supporting Information

### Petal-like Mn-doped $\alpha$ -Ni(OH)<sub>2</sub> nanosheets for high-performance Li-S cathode material

Changfeng Zhao<sup>a,\*</sup>, Hanyang Liu<sup>a</sup>, Jiawei Liu<sup>b</sup>, Yanhong Shi<sup>a</sup>, Shuguang Wang<sup>a</sup>, Qiwei Tang<sup>a</sup>, Xiangbing Zhu<sup>a</sup>, Huimin Zhang<sup>a</sup>, Yan Zhao<sup>a</sup>

<sup>a</sup>School of Energy and Mechanical Engineering, Dezhou University, DeZhou, Shandong, 253023, P. R. China

<sup>b</sup>College of Agriculture, Shihezi University, Shihezi, Xinjiang, 832003, P. R. China

\*Corresponding author: Changfeng Zhao, E-mail: 867713584@qq.com

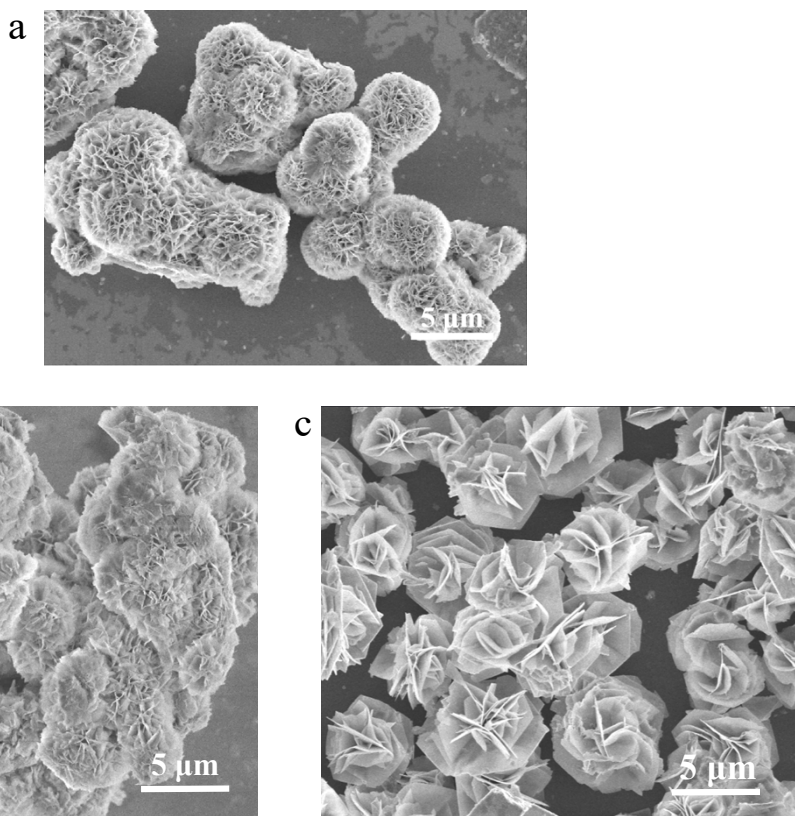

**Fig. S1** SEM images of (a) Ni(OH)<sub>2</sub>, (b) Ni<sub>1-x</sub>Mn<sub>x</sub>(OH)<sub>2</sub>, and (c) NiMn-LDH at low magnifications.

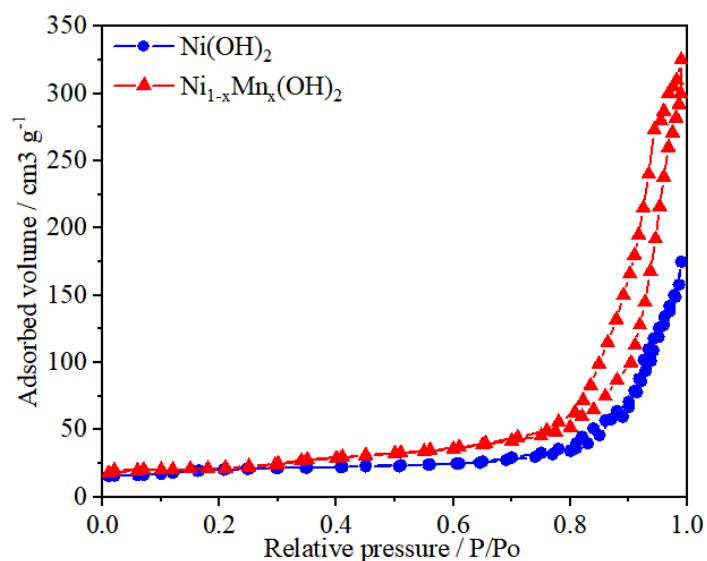

1

2 **Fig. S2** N<sub>2</sub> adsorption/desorption isotherms of Ni(OH)<sub>2</sub> and Ni<sub>1-x</sub>Mn<sub>x</sub>(OH)<sub>2</sub>.

3 The polysulfide adsorption tests show that the color of polysulfide (Fig. S3a)  
 4 changed from dark yellow to transparent after 5 h, indicating that Ni<sub>1-x</sub>Mn<sub>x</sub>(OH)<sub>2</sub> has  
 5 obviously adsorption effect on polysulfide. However, in the case of Ni(OH)<sub>2</sub> powder  
 6 (Fig. S3b), after 5 h, the color of mixture changed from dark yellow to light yellow.  
 7 The results confirm that the sulfur/polysulfide has a superior adsorption ability by Ni<sub>1-</sub>  
 8 <sub>x</sub>Mn<sub>x</sub>(OH)<sub>2</sub> host than Ni(OH)<sub>2</sub>.

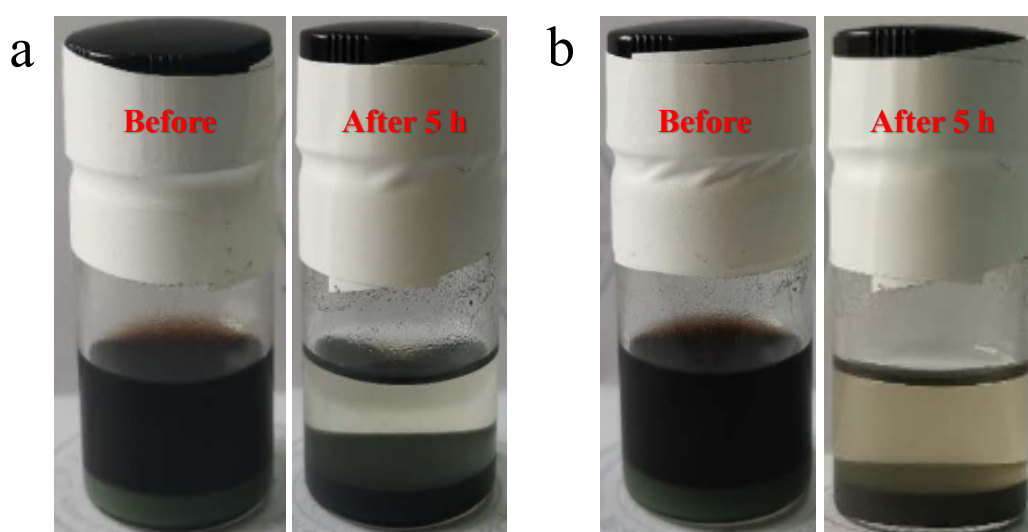

9

10 **Fig. S3** Adsorption experiment of Li<sub>2</sub>S<sub>6</sub> solution a) Ni<sub>1-x</sub>Mn<sub>x</sub>(OH)<sub>2</sub>, and b) Ni(OH)<sub>2</sub>.

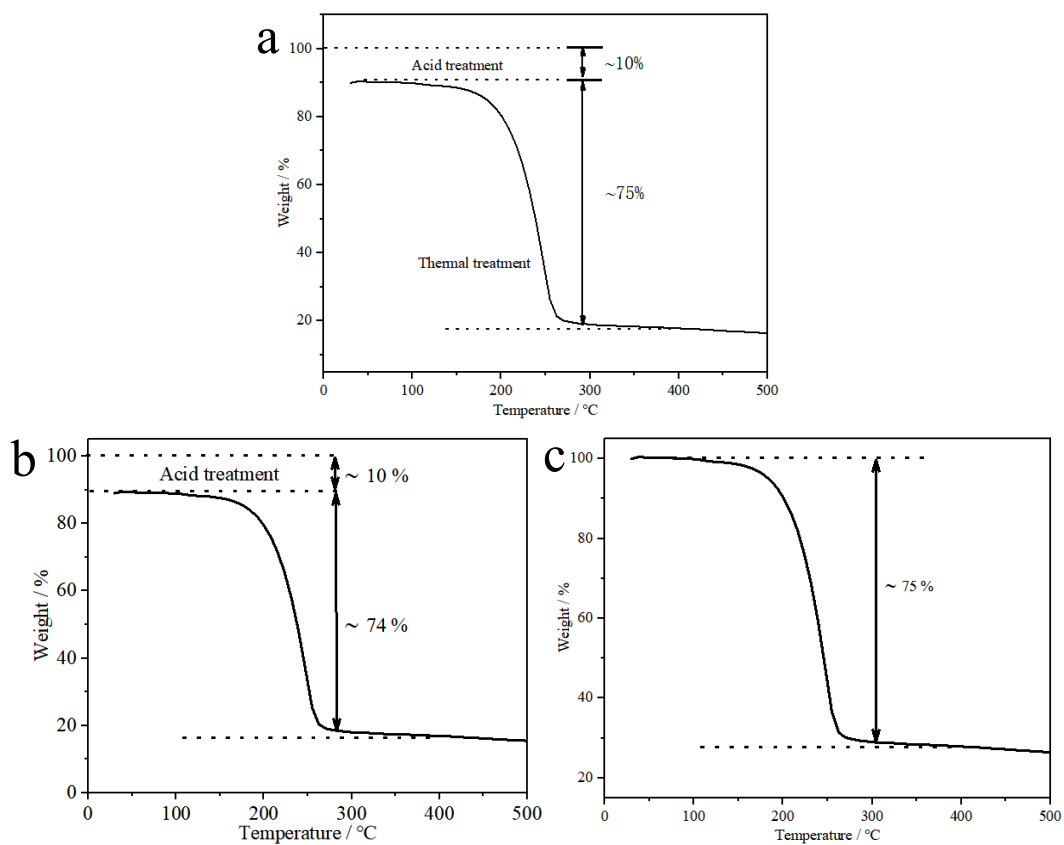

1

2 **Fig. S4** The TGA profile of (a)  $\text{Ni}_{1-x}\text{Mn}_x(\text{OH})_2/\text{S}/\text{CNT}$ , (b)  $\text{Ni}(\text{OH})_2/\text{S}/\text{CNT}$  and (c)

3 S/CNT.

4

5

6

7

8

9

10

11

12

13

1 **Table S1.** Comparison of electrochemical performance of this work with some  
 2 important references in manuscript and previously reported graphene-based Li-S  
 3 cathodes.

| Structure characteristic                                              | Sulfur percentage<br>(by weight)         | Initial discharge<br>capacity (C)   | Cycle performance<br>(cycles, C)                        | Ref.         |
|-----------------------------------------------------------------------|------------------------------------------|-------------------------------------|---------------------------------------------------------|--------------|
| Ni(OH) <sub>2</sub> @hollow carbon spheres                            | 75 %<br>(~2.1 mg cm <sup>-2</sup> )      | 961 mAh·g <sup>-1</sup><br>(0.5 C)  | 803 mAh·g <sup>-1</sup><br>(200 <sup>th</sup> , 0.5 C)  | [S1]         |
| Ni(OH) <sub>2</sub> @porous carbon/sulfur<br>composites               | 49.7 %<br>(~3 mg cm <sup>-2</sup> )      | 1310 mAh·g <sup>-1</sup><br>(0.1 C) | 720 mAh·g <sup>-1</sup><br>(70 <sup>th</sup> , 0.1 C)   | [S2]         |
| CNT-assembled dodecahedra<br>core@NH shell                            | 78.4 %<br>(2 mg cm <sup>-2</sup> )       | 1115 mAh·g <sup>-1</sup><br>(0.1 C) | 724 mAh·g <sup>-1</sup><br>(100 <sup>th</sup> , 0.1 C)  | [S3]         |
| Uniform α-Ni(OH) <sub>2</sub> hollow spheres                          | 81%<br>(~2.5 mg cm <sup>-2</sup> )       | 708 mAh·g <sup>-1</sup><br>(1 C)    | 595 mAh·g <sup>-1</sup><br>(200 <sup>th</sup> , 1C)     | [S4]         |
| NH-Modified Sulfur/Carbon<br>Composite                                | 60 %<br>(~1.5 mg cm <sup>-2</sup> )      | 897 mAh·g <sup>-1</sup><br>(0.2 C)  | 787 mAh·g <sup>-1</sup><br>(100 <sup>th</sup> , 0.2 C)  | [S5]         |
| Ca(OH) <sub>2</sub> -Carbon Framework                                 | 63 %<br>(1.2-1.5 mg cm <sup>-2</sup> )   | 1215 mAh·g <sup>-1</sup><br>(0.5 C) | 873 mAh·g <sup>-1</sup><br>(250 <sup>th</sup> , 0.5 C)  | [7]          |
| CB@Ni(OH) <sub>2</sub>                                                | 78.4 %<br>(1.8-2.5 mg cm <sup>-2</sup> ) | 968 mAh·g <sup>-1</sup><br>(0.2 C)  | 1100 mAh·g <sup>-1</sup><br>(150 <sup>th</sup> , 0.2 C) | [8]          |
| Flexible Nanostructured Paper of<br>rGO                               | 44 %                                     | 1302 mAh·g <sup>-1</sup><br>(0.1 C) | 978 mAh·g <sup>-1</sup><br>(200 <sup>th</sup> , 0.1C)   | [23]         |
| TiC nanoparticles@ GO                                                 | 66.6 %<br>(~3.5 mg cm <sup>-2</sup> )    | 1032 mAh·g <sup>-1</sup><br>(0.2 C) | 670 mAh·g <sup>-1</sup><br>(100 <sup>th</sup> , 0.2C)   | [24]         |
| CoS <sub>2</sub> @GO                                                  | 66.6 %<br>(~2.9 mg cm <sup>-2</sup> )    | 1368 mAh·g <sup>-1</sup><br>(0.5 C) | 1005 mAh·g <sup>-1</sup><br>(150 <sup>th</sup> , 0.5C)  | [29]         |
| Hollow carbon nanofiber@N-doped<br>porous carbon core-shell composite | 77.5 %<br>(1.8-2.5 mg cm <sup>-2</sup> ) | 1170 mAh·g <sup>-1</sup><br>(0.5 C) | 590 mAh·g <sup>-1</sup><br>(200 <sup>th</sup> , 0.5C)   | [32]         |
| self-supporting CoNi@porous N-<br>doped carbon fibers                 | 69.7 %                                   | 798 mAh·g <sup>-1</sup><br>(5 C)    | 770 mAh·g <sup>-1</sup><br>(1500 <sup>th</sup> , 5C)    | [40]         |
| Co <sub>4</sub> N/N-doped graphene                                    | 77.5 %<br>(4.1 mg cm <sup>-2</sup> )     | 1109 mAh·g <sup>-1</sup><br>(0.5 C) | 810 mAh·g <sup>-1</sup><br>(150 <sup>th</sup> , 0.5C)   | [41]         |
| Ni <sub>1-x</sub> Mn <sub>x</sub> (OH) <sub>2</sub>                   | 75 %<br>(~5 mg cm <sup>-2</sup> )        | 1375 mAh·g <sup>-1</sup><br>(0.2 C) | 813 mAh·g <sup>-1</sup><br>(200 <sup>th</sup> , 0.2 C)  | This<br>work |

## 1 References

- 2 [S1] J. G. Zhao, Ni(OH)<sub>2</sub>@hollow carbon spheres/sulfur composites as cathode  
3 materials for high-performance Li-S batteries. *J. Mater. Sci-Mater. el.* 2019, **30**,  
4 17155-17163.
- 5 [S2] Y. Xia, H. Y. Zhong, R. Y. Fang, C. Liang, Z. Xiao, H. Huang, Y. P. Gan, J.  
6 Zhang, X. Y. Tao, W. K. Zhang, Biomass derived Ni(OH)<sub>2</sub>@porous carbon/sulfur  
7 composites synthesized by a novel sulfur impregnation strategy based on supercritical  
8 CO<sub>2</sub> technology for advanced Li-S batteries. *J. Power Sources* 2018, **378**, 73-80.
- 9 [S3] H. L. Wu, Y. Li, J. Ren, D. W. Rao, Q. J. Zheng, L. Zhou, D. M. Lin, CNT-  
10 assembled dodecahedra core@nickel hydroxide nanosheet shell enabled sulfur  
11 cathode for high-performance lithium-sulfur batteries. *Nano Energy* 2019, **55**, 82-92.
- 12 [S4] C. L. Dai, L. Y. Hu, M. Q. Wang, Y. M. Chen, J. Han, J. Jiang, Y. Zhang, B. L.  
13 Shen, Y. B. Niu, S. J. Bao, M. W. Xu, Uniform  $\alpha$ -Ni(OH)<sub>2</sub> hollow spheres  
14 constructed from ultrathin nanosheets as efficient polysulfide mediator for long-term  
15 lithium-sulfur batteries. *Energy Storage Mater.* 2017, **8**, 202-208.
- 16 [S5] X. Q. Niu, X. L. Wang, D. Xie, D. H. Wang, Y. D. Zhang, Y. Li, T. Yu, J. P. Tu.  
17 Nickel hydroxide-modified sulfur/carbon composite as a highperformance cathode  
18 material for lithium sulfur battery. *ACS Appl. Mater. Inter.* 2015, **7**, 16715-16722.
- 19 [7] H. Y. Shao, B. C. Huang, N. Q. Liu, W. K. Wang, H. Zhang, A. B. Wang, F.  
20 Wang, Y. Q. Huang, Modified separators coated with a Ca(OH)<sub>2</sub>-carbon framework  
21 derived from crab shells for lithium-sulfur batteries, *J. Mater. Chem. A* 2016, **4**,  
22 16627-16634.

1 [8] J. Jiang, J. Zhu, W. Ai, X. Wang, Y. Wang, C. Zou, W. Huang and T. Yu,  
2 Encapsulation of sulfur with thin-layered nickel-based hydroxides for long-cyclic  
3 lithium-sulfur cells, *Nat. Commun.* 2015, **6**, 8622-8630.

4 [23] J. Cao, C. Chen, Q. Zhao, N. Zhang, Q. Lu, X. Wang, Z. Niu, J. Chen, A flexible  
5 nanostructured paper of a reduced graphene oxide-sulfur composite for high-  
6 performance lithium-sulfur batteries with unconventional configurations, *Adv. Mater.*  
7 2016, **28**, 9629-9636.

8 [29] Z. Yuan, H. J. Peng, T. Z. Hou, J. Q. Huang, C. M. Chen, D. W. Wang, X. B.  
9 Cheng, F. Wei, Q. Zhang, Powering lithium-sulfur battery performance by propelling  
10 polysulfide redox at sulfiphilic hosts, *Nano Lett.* 2016, **16**, 519-527.

11 [32] Q. Li, Z. A. Zhang, Z. P. Guo, Y. Q. Lai, K. Zhang, Improved cyclability of  
12 lithium-sulfur battery cathode using encapsulated sulfur in hollow carbon  
13 nanofiber@nitrogen-doped porous carbon core-shell composite. *Carbon* 2014, **78**, 1-9.

14 [40] Y. S. He, M. J. Li, Y. G. Zhang, Z. Z. Shan, Y. Zhao, J. D. Li, G. H. Liu, C. Y.  
15 Liang, Z. Bakenov, Q. Li, All-purpose electrode design of flexible conductive  
16 scaffold toward high-performance Li-S batteries, *Adv. Funct. Mater.* 2020, **30**,  
17 2000613.

18 [41] M. Zhao, H. J. Peng, B. Q. Li, X. Chen, J. Xie, X. Y. Liu, Q. Zhang, J. Q. Huang,  
19 Electrochemical phase evolution of metal-based pre-catalysts for high-rate polysulfide  
20 conversion, *Angew. Chem. Int. Ed.* 2020, **132**, 9096-9102.
